# Supplementary material for: Homologous Recombination Drives Both Sequence Diversity and Gene Content Variation in Neisseria meningitidis
Source: PubMed Central journal article supplement — Genome Biol Evol. 2013 Jul 30;5(9):1611–27. doi: 10.1093/gbe/evt116 (PMC3787668; doi:10.1093/gbe/evt116), 2013-07-30
Supplement: supp_evt116_Kong_Nm_SuppRevised0628Final.pdf [file supp_evt116_Kong_Nm_SuppRevised0628Final.pdf]

## Supplementary File

Table S1. Information about genomes analyzed in this study.

| Species                | Strain       | Serogroup     | ST          | CC    | Accession     |
|------------------------|--------------|---------------|-------------|-------|---------------|
| <i>N. meningitidis</i> | Z2491        | A             | 4           | 4     | AL157959      |
| <i>N. meningitidis</i> | WUE 2594     | A             | 5           | 5     | FR774048      |
| <i>N. meningitidis</i> | G2136        | B             | 8           | 8     | CP002419      |
| <i>N. meningitidis</i> | 961-5945     | B             | 153         | 8     | AEQK00000000  |
| <i>N. meningitidis</i> | K1207        | C             | 11          | 11    | ADWM00000000  |
| <i>N. meningitidis</i> | S0108        | C             | 11          | 11    | ADWN00000000  |
| <i>N. meningitidis</i> | FAM18        | C             | 11          | 11    | AM421808      |
| <i>N. meningitidis</i> | ES14902      | B             | 11          | 11    | AEQI00000000  |
| <i>N. meningitidis</i> | M6190        | B             | 1988        | 11    | AEQF00000000  |
| <i>N. meningitidis</i> | NEM8013      | C             | 177         | 18    | FM999788      |
| <i>N. meningitidis</i> | Nm6938       | W135          | 22          | 22    | AGBQ00000000  |
| <i>N. meningitidis</i> | Nm2732       | W135          | 22          | 22    | AGBP00000000  |
| <i>N. meningitidis</i> | Nm6756       | Y             | 23          | 23    | AGBR00000000  |
| <i>N. meningitidis</i> | Nm8663       | Y             | 23          | 23    | AGBS00000000  |
| <i>N. meningitidis</i> | NS44         | Y             | 23          | 23    | AEPJ00000000  |
| <i>N. meningitidis</i> | H44/76       | B             | 32          | 32    | CP002420      |
| <i>N. meningitidis</i> | CU385        | B             | 33          | 32    | AEQJ00000000  |
| <i>N. meningitidis</i> | MC58         | B             | 74          | 32    | AE002098      |
| <i>N. meningitidis</i> | M01-240149   | B             | 41          | 41/44 | CP002421      |
| <i>N. meningitidis</i> | NZ-05/33     | B             | 42          | 41/44 | CP002424      |
| <i>N. meningitidis</i> | M0579        | B             | 43          | 41/44 | AEQH00000000  |
| <i>N. meningitidis</i> | $\alpha$ 710 | B             | 136         | 41/44 | CP001561      |
| <i>N. meningitidis</i> | OX99-30304   | B             | 8094 $\xi$  | 41/44 | AEQE00000000  |
| <i>N. meningitidis</i> | $\alpha$ 14  | NG-cn1        | 53          | 53    | AM889136      |
| <i>N. meningitidis</i> | Nm9418       | C             | 60          | 60    | ARYG00000000* |
| <i>N. meningitidis</i> | Nm10259      | C             | 60          | 60    | ARYF00000000* |
| <i>N. meningitidis</i> | Nm8187       | Y             | 3923        | 167   | AGBN00000000  |
| <i>N. meningitidis</i> | Nm3127       | Y             | 3980        | 167   | AGBO00000000  |
| <i>N. meningitidis</i> | N1568        | NG $^\dagger$ | 751         | 181   | AEQD00000000  |
| <i>N. meningitidis</i> | M01-240355   | B             | 213         | 213   | CP002422      |
| <i>N. meningitidis</i> | M04-240196   | B             | 269         | 269   | CP002423      |
| <i>N. meningitidis</i> | M01-240013   | B             | 1159 $\phi$ | 269   | AEQL00000000  |
| <i>N. meningitidis</i> | M13399       | B             | 2976        | 269   | AEQG00000000  |
| <i>N. meningitidis</i> | Nm1140       | NG-cn1        | 1136        | 1136  | AGBT00000000  |
| <i>N. meningitidis</i> | 053442       | C             | 4821        | 4821  | CP000381      |
| <i>N. meningitidis</i> | ATCC 13091   | B             | 7355        | -     | AEEF00000000  |
| <i>N. gonorrhoeae</i>  | TCDC-NG08107 | -             | 7363        | -     | CP002440      |
| <i>N. gonorrhoeae</i>  | NCCP11945    | -             | 1901        | -     | CP001050      |
| <i>N. gonorrhoeae</i>  | FA1090       | -             | 1899        | -     | AE004969      |
| <i>N. lactamica</i>    | 020-06       | -             | 640         | 640   | HQ332785      |

\*Sequenced in this study

$^\dagger$ NG: Non-groupable

$\xi$  Inferred directly from the genomic data, but reported as ST44 in Budroni et al. 2011

$\phi$  Inferred directly from the genomic data, but reported as ST275 in Budroni et al. 2011

Table S2. Phylogenetic incongruence between individual MLST locus and the concatenated sequence of the seven MLST loci.

| Name        | P-values              |                       |
|-------------|-----------------------|-----------------------|
|             | Individual sequence   | Concatenated sequence |
| <i>abcZ</i> | $4.5 \times 10^{-08}$ | $5.0 \times 10^{-53}$ |
| <i>adk</i>  | $3.0 \times 10^{-33}$ | $1.1 \times 10^{-08}$ |
| <i>aroE</i> | $1.0 \times 10^{-03}$ | $1.5 \times 10^{-06}$ |
| <i>fumC</i> | $2.5 \times 10^{-08}$ | $1.0 \times 10^{-54}$ |
| <i>gdh</i>  | $3.5 \times 10^{-07}$ | $5.2 \times 10^{-55}$ |
| <i>pdhC</i> | $5.0 \times 10^{-27}$ | $3.0 \times 10^{-18}$ |
| <i>pgm</i>  | $5.0 \times 10^{-09}$ | $5.0 \times 10^{-08}$ |

The AU test was performed 10 times between each individual phylogeny and the concatenated-sequence phylogeny using both the individual sequence and the concatenated sequence of the seven MLST loci, and the median P-value was presented.

Table S3. Variable genes only present in Nm10259 or Nm9418.

| Genome  | Gene Name <sup>†</sup> | Panel in Fig.2 | COG      | Protein Function                |
|---------|------------------------|----------------|----------|---------------------------------|
| Nm10259 | <i>cas1</i>            | A              | COG1518L | hypothetical protein            |
|         | <i>cas2</i>            | A              | COG3512S | hypothetical protein            |
|         | <i>csn1</i>            | A              | COG3513S | hypothetical protein            |
|         | NMA1079 <sup>(2)</sup> | B              | -        | hypothetical protein            |
|         | NMA1080                | B              | -        | hypothetical protein            |
|         | NMA1081                | B              | -        | hypothetical protein            |
|         | NMC0806                | B              | -        | integral membrane protein       |
|         | NMB0432                | C              | COG0730R | hypothetical protein            |
|         | NMAA_1384              | D              | -        | putative lipoprotein            |
|         | NMV_2010               | E              | -        | hypothetical protein            |
|         | NMO0338                | E              | -        | hypothetical protein            |
|         | NMC0889                | E              | -        | integral membrane protein       |
|         | NMC0890                | E              | -        | integral membrane protein       |
|         | <i>nadA</i>            | F              | COG0379H | adhesin/invasin autotransportor |
|         | NMB1202                | H              | -        | hypothetical protein            |
| Nm9418  | NMB1828                | A              | COG2819R | hypothetical protein            |
|         | NMB1829                | A              | COG4773P | TonB-dependent receptor         |
|         | NMB0856                | B              | -        | hypothetical protein            |
|         | NMB0857                | B              | -        | hypothetical protein            |
|         | NMB0858                | B              | -        | hypothetical protein            |
|         | NMB0859                | B              | -        | hypothetical protein            |
|         | NMB0860                | B              | -        | hypothetical protein            |
|         | NMB0861                | B              | -        | hypothetical protein            |
|         | NMB0863                | B              | -        | hypothetical protein            |
|         | NMCC_0822              | B              | -        | hypothetical protein            |
|         | NMC1730                | C              | COG5505S | integral membrane protein       |
|         | <i>ddpX</i>            | C              | COG2173M | D-alanyl-d-alanine dipeptidase  |
|         | NMB1665                | D              | COG3744S | hypothetical protein            |
|         | NMB1666                | D              | COG4118D | hypothetical protein            |
|         | <i>hpuB</i>            | D              | COG1629P | hemoglobin utilization protein  |
|         | NMO0341                | E              | -        | hypothetical protein            |
|         | NMO0342                | E              | -        | hypothetical protein            |
|         | N1568_0676             | G              | -        | hypothetical protein            |
|         | NMB0644                | I              | -        | hypothetical protein            |
|         | NMB0645                | I              | -        | hypothetical protein            |

<sup>†</sup>Gene names were following other well annotated *Nm* genomes.

<sup>(2)</sup>There are two copies of NMB1079 present in Nm10259.

Table S4. Nonvertical genes in ST60 that have been previously identified as putative virulence genes.

| Gene Name   | COG       | Protein Function                                     |
|-------------|-----------|------------------------------------------------------|
| <i>ctrB</i> | COG3524M  | capsule polysaccharide export inner-membrane protein |
| <i>tbp</i>  | COG1629P  | transferrin-binding protein B                        |
| <i>kdsB</i> | COG1212M  | 3-deoxy-manno-octulosonate cytidyltransferase        |
| NMB1494     | COG2879S  | hypothetical protein NMB1494                         |
| <i>lgtF</i> | COG0463M  | beta-1,4-glucosyltransferase                         |
| <i>rfaK</i> | COG0438M  | alpha 1,2 N-acetylglucosamine transferase            |
| <i>gcp</i>  | COG0533O  | DNA-binding/iron metalloprotein/AP endonuclease      |
| <i>pglC</i> | COG0399M  | pilin glycosylation protein                          |
| <i>pglD</i> | COG1086MG | pilin glycosylation protein                          |
| NMB1845     | COG0526OC | thioredoxin                                          |
| <i>fetB</i> | COG4607P  | iron ABC transporter substrate-binding protein       |
| <i>porB</i> | COG3203M  | major outer membrane protein PIB                     |

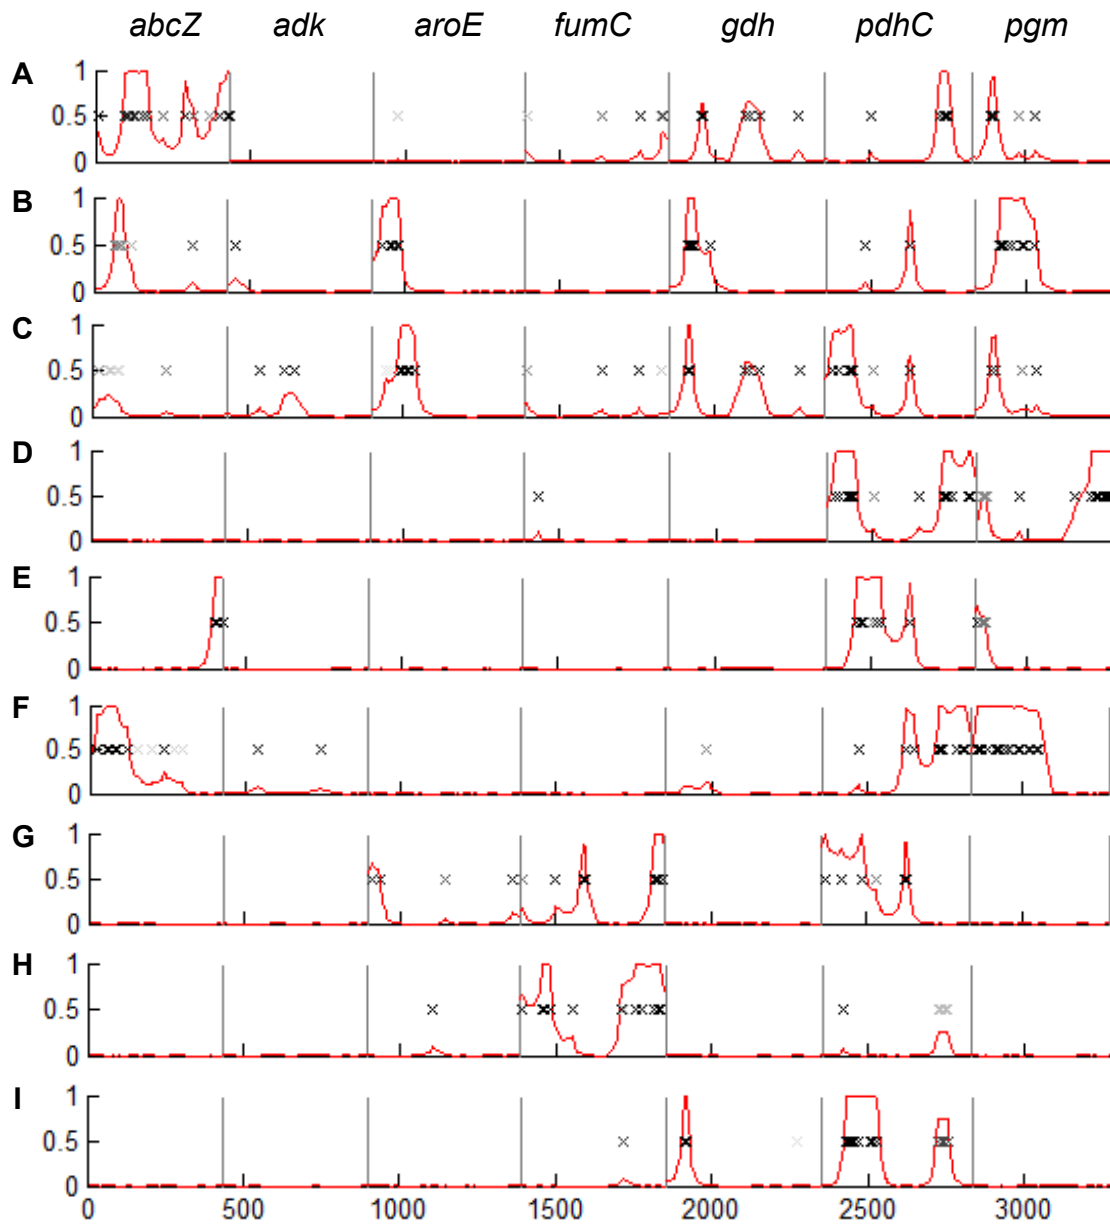

**Figure S1.** Recombination events identified by ClonalFrame, using the seven MLST loci, on the branches leading to individual CCs as shown in Figure 1C. The columns represented the seven MLST loci. "x" indicated substitutions inferred to have occurred in the respective branches. Red lines represented the probability for each nucleotide to have been imported by means of recombination. Values at the bottom represented nucleotide positions in the concatenated sequence of the seven MLST loci.

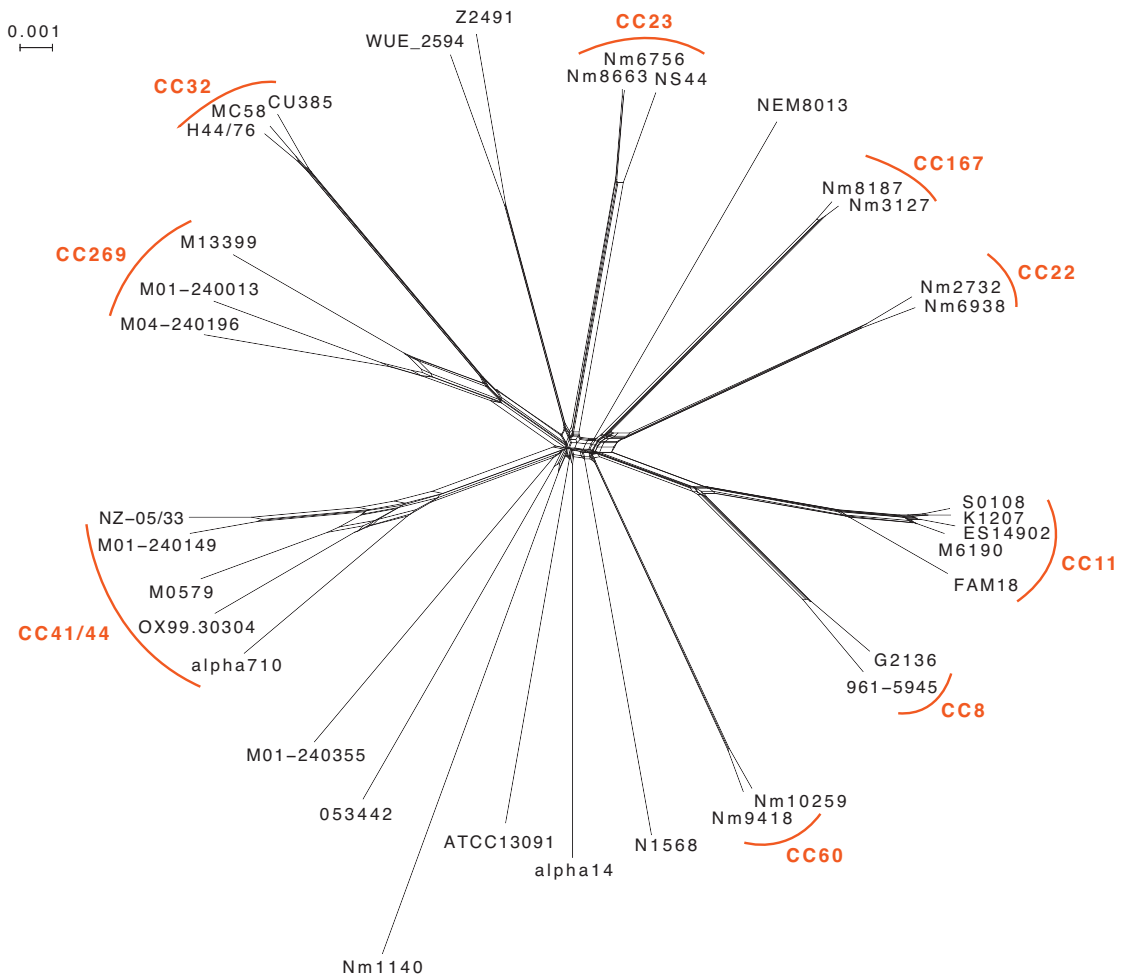

**Figure S2.** Neighbour-net networks of the concatenated sequences of the 1090 single-copy genes present in all studied *Nm* genomes. Nucleotide distance was corrected using the F84 substitution matrix.

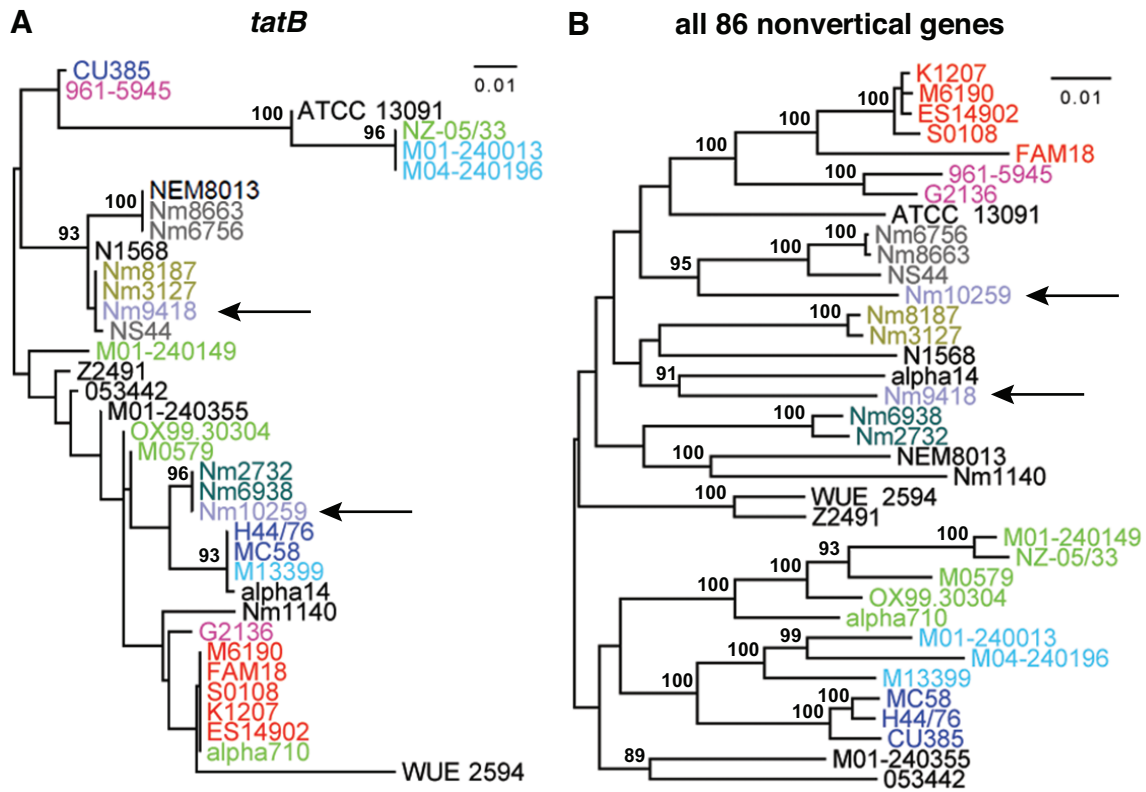

**Figure S3.** Maximum likelihood trees of one representative nonvertical gene in ST60, *tatB* (A) and the concatenated sequences of all the 86 nonvertical genes presented in all *Nm* strains (B). The two ST60 strains (by arrows) were well separated on both phylogenies. Strains are color-coded as in Figure 1. 100 bootstrap iterations were performed for each phylogeny and bootstrap values >85 are shown.

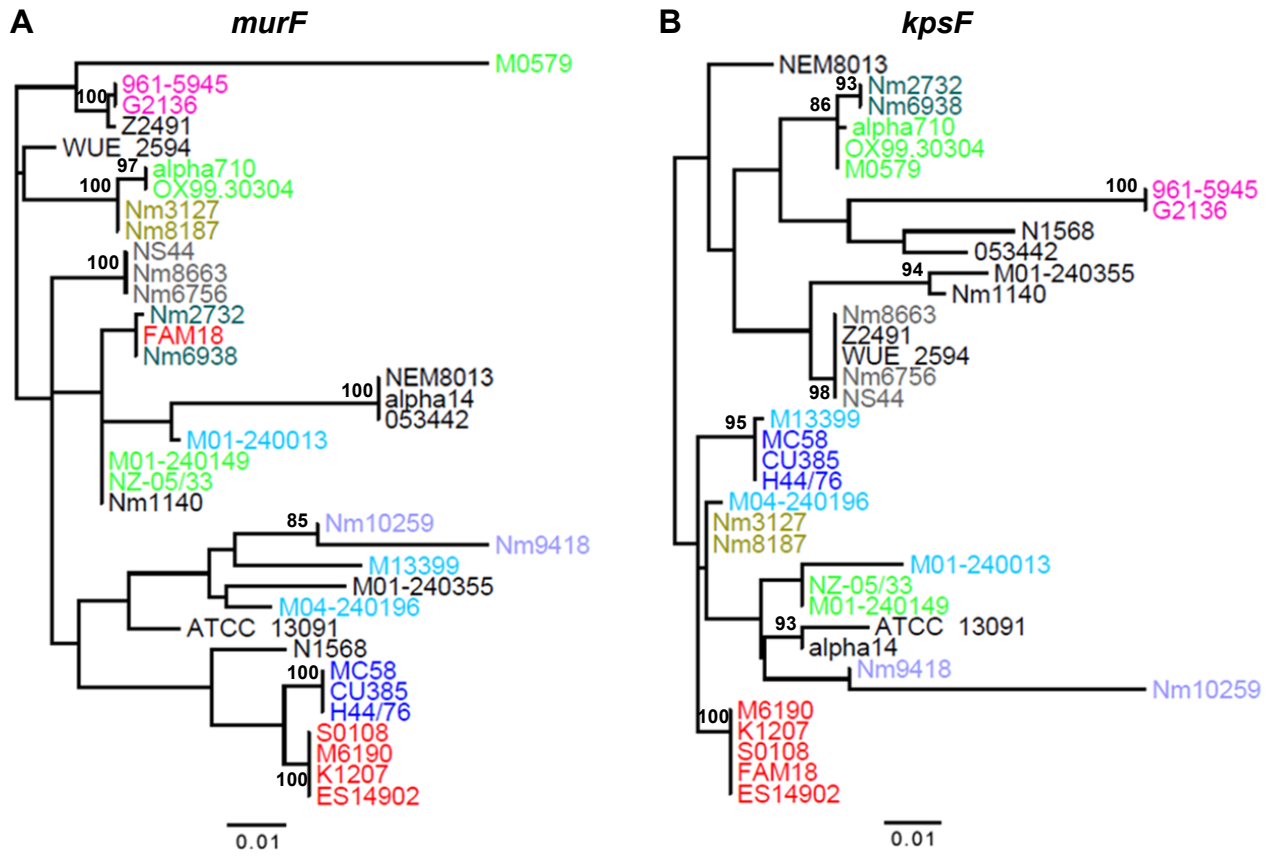

**Figure S4.** Maximum likelihood trees of two nonvertical ST60 genes, *murF* (A) and *kpsF* (B). On both phylogenies, Nm10259 and Nm9418 were clustered together, but there was a significantly elongated branch leading to Nm10259 or Nm9418. Strains are color-coded as in Figure 1. 100 bootstrap iterations were performed for each phylogeny and bootstrap values >85 are shown.





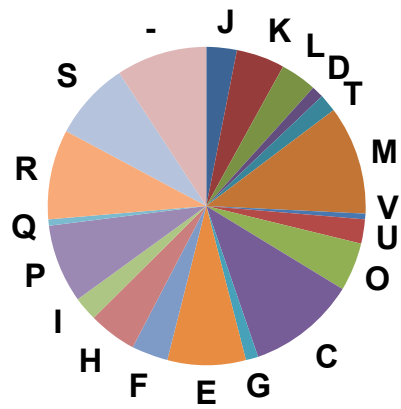

**Figure S6.** COG functional categories of the 152 nonvertical genes in ST-60. The major functional categories are information storage and processing (COG categories J, K and L), cellular processes and signaling (COG categories D, V, T, M, U and O), metabolism (COG categories C, G, E, F, H, I, P and Q), and poorly characterized (COG categories R and S). ‘-’ refers to no information in COG.

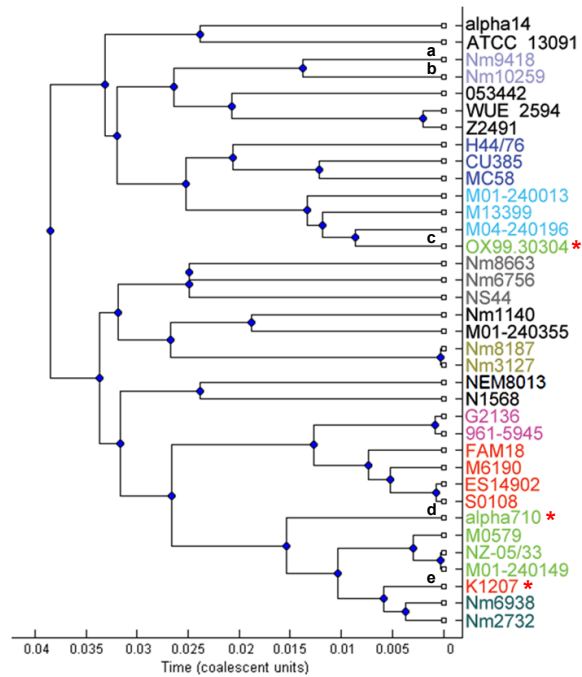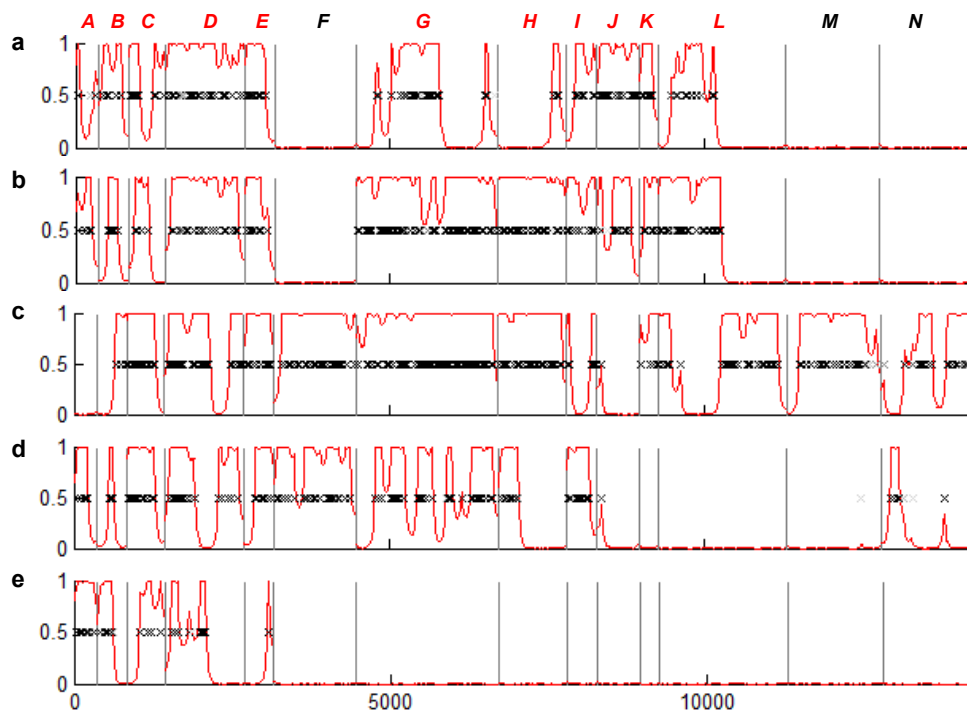

**Figure S7.** Recombination events in the *nuo* gene cluster identified by ClonalFrame. A majority rule consensus tree was constructed by ClonalFrame using the concatenated sequences of the 14 *nuo* genes (upper panel). Strains not grouped with other strains of the belonged CC were labeled with a red asterisk (\*). The columns represented the 14 genes in the *nuo* gene locus. In each row, "x" indicated substitutions inferred to have occurred in the respective branches as labeled on the tree. Red lines represented the probability for each nucleotide to have been imported by means of recombination. Values at the bottom represented nucleotide positions in the concatenated sequence of the 14 *nuo* genes.

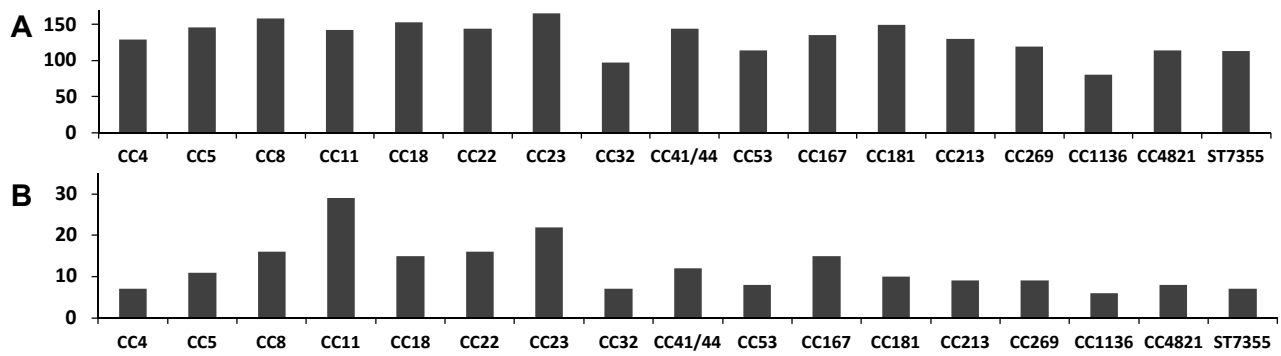

**Figure S8.** Distribution of recombination partners in CCs of identical genes (A) and nonvertical genes (B) between Nm10259 and Nm9418. Unlike in Figure 4, the recombination partners were defined by the nearest neighbors of the Nm10259 genes and Nm9418 genes. The total number of recombination partners in each CC is presented.

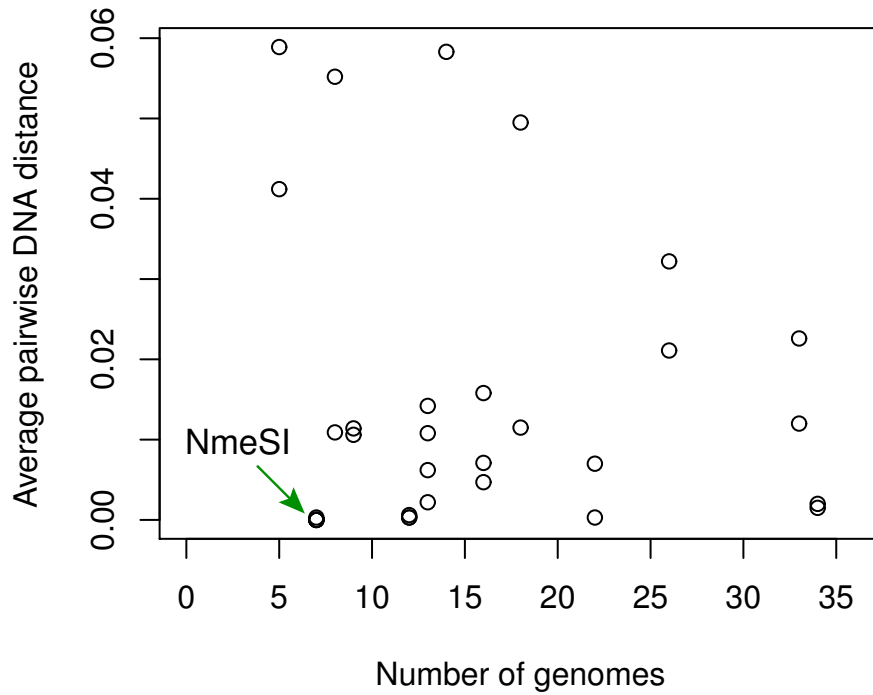

**Figure S9.** No significant correlation between sequence divergence and distribution of the RMS genes. Spearman's rank correlation test was performed between the average pairwise DNA distance of each RMS gene and the number of present genomes ( $P=0.14$ ). All RMS genes present in at least five genomes were analyzed (the same dataset as in the AU test in Table 2). As labeled, all the NmeSI genes were identical at the sequence level.

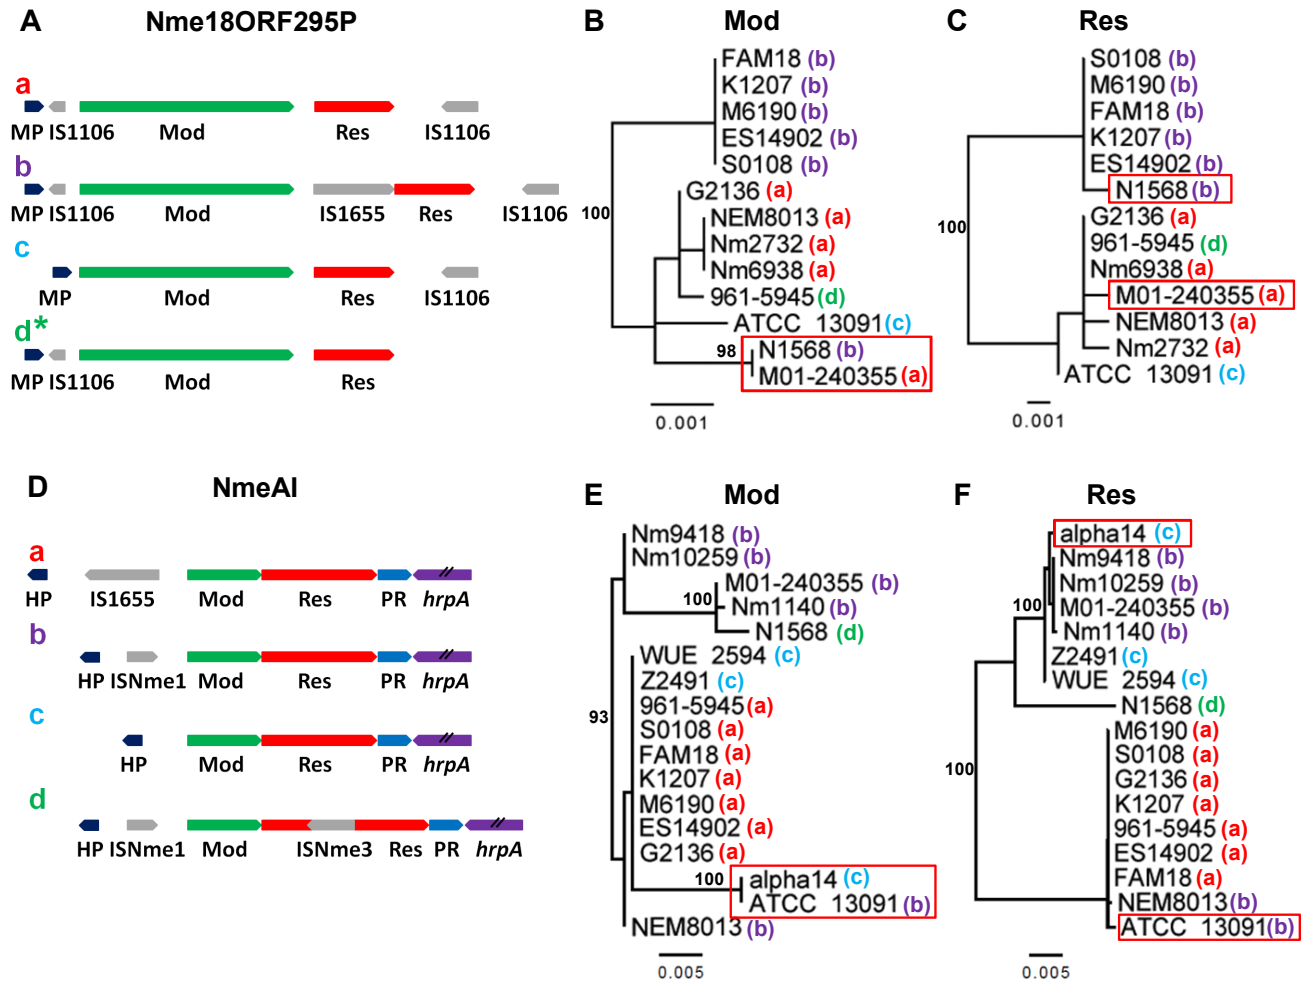

**Figure S10.** Phylogenetic incongruence of the RMS genes in Nme18ORF295P (A-C) and NmeAI (D-F). All possible gene organizations of each RMS were shown on the left, as A for Nme18ORF295P and D for NmeAI. Genes were drawn as arrows, and empty spaces between the arrows represented intergenic regions. Some abbreviations were used: Mod, modification gene; Res, restriction gene; PR, patch repair gene; MP, probable inner membrane protein; HP, conserved hypothetical protein. In the 961-5945 genome (shown as d\*), the gene after the restriction gene could not be identified due to the end of the contig. Maximum likelihood trees constructed for both the modification and restriction genes of Nme18ORF295P (B and C) and NmeAI (E and F). 100 bootstrap iterations were performed in each phylogenetic construction, and bootstrap values >85 are shown. Strains that showed strikingly different positions between the modification and restriction genes are boxed. The letters in parenthesis beside the strain names are the gene organization in each strain.

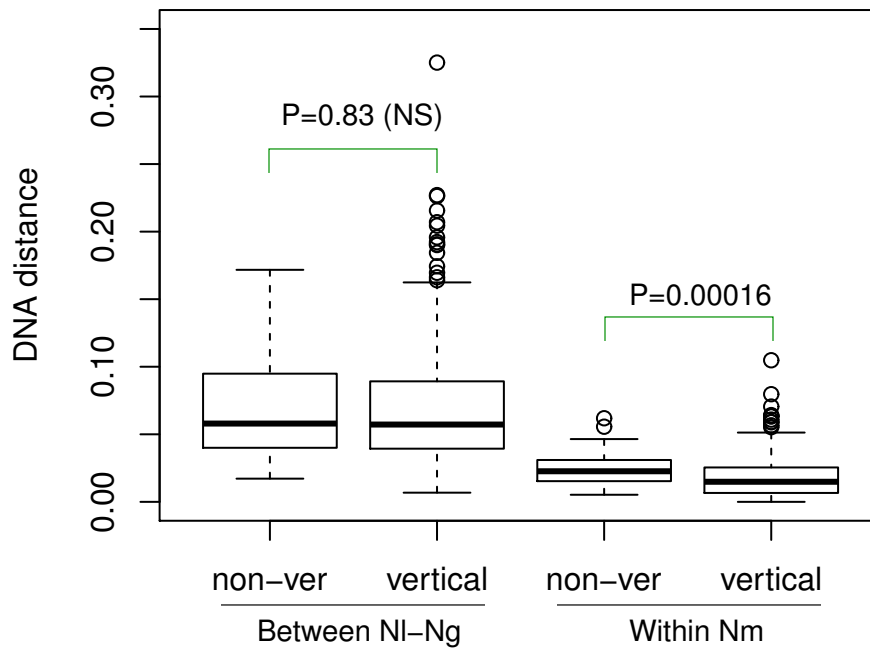

**Figure S11.** No significant acceleration of DNA distance between the *Ng* and *Nl* (*N. lactamica*) homologs of the nonvertical ST60 genes. All genes analyzed here were present in all 36 *Nm* genomes, all three *Ng* genomes and the *Nl* genome as well. The distance between *Nl-Ng* was the average between *Nl* and each of the three *Ng* genomes, and the distance within *Nm* was the average of all possible pairwise distance among the 36 *Nm* genomes. P-values were calculated using the Wilcoxon signed-rank test.
